# Supplementary material for: CUL4-DDB1-CRBN E3 Ubiquitin Ligase Regulates Proteostasis of ClC-2 Chloride Channels: Implication for Aldosteronism and Leukodystrophy
Source: PubMed Central journal article supplement (PMC7348978; doi:10.3390/cells9061332), 2020-05-26

## **Supplementary Material**

### **CUL4-DDB1-CRBN E3 ubiquitin ligase regulates proteostasis of CIC-2 chloride channels: implication for aldosteronism and leukodystrophy**

Ssu-Ju Fu, Meng-Chun Hu, Yi-Jheng Peng, Hsin-Yu Fang, Cheng-Tsung Hsiao,  
Tsung-Yu Chen, Chung-Jiuan Jeng, and Chih-Yung Tang

**Supplementary Table S1. Power analyses for the statistical data presented in the main figures.**

**Supplementary Figure S1. Uncropped images of the immunoblots presented in the main figures.**

**Supplementary Table S1. Power analyses for the statistical data presented in the main figures.**

**Fig. 1A**

Two Sample Independent t-Test

| t        | DoF | P Value |
|----------|-----|---------|
| -6.29041 | 10  | 0.00009 |

Power Analysis

| Alpha | Total Sample Size | Power   |
|-------|-------------------|---------|
| 0.05  | 12                | 0.99886 |

**Fig. 1B**

Two Sample Independent t-Test

| t        | DoF | P Value |
|----------|-----|---------|
| -3.34548 | 22  | 0.00293 |

Power Analysis

| Alpha | Total Sample Size | Power   |
|-------|-------------------|---------|
| 0.05  | 24                | 0.89161 |

**Fig. 1C**

One-Way ANOVA

| Source | DoF | Sum of Squares | Mean Square | F Value  | P Value |
|--------|-----|----------------|-------------|----------|---------|
| Model  | 6   | 21.7004134     | 3.61673557  | 16.99584 | 0.00000 |
| Error  | 60  | 12.7680705     | 0.212801176 |          |         |

Power Analysis

Total

| Alpha | Sample Size | Power   |
|-------|-------------|---------|
| 0.05  | 67          | 1.00000 |

Fig. 2D

Two Sample Independent t-Test

| t       | DoF | P Value |
|---------|-----|---------|
| 2.97363 | 18  | 0.00814 |

Power Analysis

| Alpha | Total Sample Size | Power   |
|-------|-------------------|---------|
| 0.05  | 20                | 0.80288 |

Fig. 2E

Two Sample Independent t-Test

| t      | DoF | P Value |
|--------|-----|---------|
| 4.8717 | 12  | 0.00038 |

Power Analysis

| Alpha | Total Sample Size | Power   |
|-------|-------------------|---------|
| 0.05  | 14                | 0.99022 |

Fig. 2F

Two Sample Independent t-Test

| t       | DoF | P Value |
|---------|-----|---------|
| 0.09489 | 4   | 0.92897 |

Power Analysis

| Alpha | Total<br>Sample Size | Power   |
|-------|----------------------|---------|
| 0.05  | 6                    | 0.05027 |

Fig. 4A

Two Sample Independent t-Test

| t        | DoF | P Value |
|----------|-----|---------|
| -6.63852 | 8   | 0.00016 |

Power Analysis

| Alpha | Total<br>Sample Size | Power   |
|-------|----------------------|---------|
| 0.05  | 10                   | 0.99876 |

Fig. 5B

One-Way ANOVA

| Source | DoF | Sum of<br>Squares | Mean<br>Square | F Value   | P Value |
|--------|-----|-------------------|----------------|-----------|---------|
| Model  | 2   | 1.27886667        | 0.639433333    | 150.25849 | 0.00000 |
| Error  | 9   | 0.0383000000      | 0.00425555556  |           |         |

Power Analysis

| Alpha | Total<br>Sample Size | Power   |
|-------|----------------------|---------|
| 0.05  | 12                   | 1.00000 |

Fig. 5C

Two Sample Independent t-Test

| t | DoF | P Value |
|---|-----|---------|
|---|-----|---------|

|          |   |         |
|----------|---|---------|
| -3.87966 | 8 | 0.00468 |
|----------|---|---------|

Power Analysis

| Alpha | Total Sample Size | Power   |
|-------|-------------------|---------|
| 0.05  | 10                | 0.92303 |

Fig. 5D

Two Sample Independent t-Test

| t        | DoF | P Value |
|----------|-----|---------|
| -5.51817 | 12  | 0.00013 |

Power Analysis

| Alpha | Total Sample Size | Power   |
|-------|-------------------|---------|
| 0.05  | 14                | 0.99706 |

Fig. 5F

Two Sample Independent t-Test

| t        | DoF | P Value |
|----------|-----|---------|
| -3.62144 | 12  | 0.00351 |

Power Analysis

| Alpha | Total Sample Size | Power   |
|-------|-------------------|---------|
| 0.05  | 14                | 0.91269 |

Fig. 7B

(CIC-2 level)

Two Sample Independent t-Test

| t        | DoF | P Value |
|----------|-----|---------|
| -2.53797 | 12  | 0.02604 |

Power Analysis

| Alpha | Total Sample Size | Power   |
|-------|-------------------|---------|
| 0.05  | 14                | 0.63739 |

(CRBN level)

Two Sample Independent t-Test

| t       | DoF | P Value |
|---------|-----|---------|
| 3.10685 | 4   | 0.03598 |

Power Analysis

| Alpha | Total Sample Size | Power   |
|-------|-------------------|---------|
| 0.05  | 6                 | 0.62325 |

Fig. 7C

Two Sample Independent t-Test

| t       | DoF | P Value |
|---------|-----|---------|
| 4.53116 | 12  | 0.00069 |

Power Analysis

| Alpha | Total Sample Size | Power   |
|-------|-------------------|---------|
| 0.05  | 14                | 0.98173 |

Fig. 7D

Two Sample Independent t-Test

| t        | DoF | P Value |
|----------|-----|---------|
| -1.17778 | 16  | 0.25611 |

Power Analysis

| Alpha | Total Sample Size | Power   |
|-------|-------------------|---------|
| 0.05  | 18                | 0.18234 |

Fig. 7E

Two Sample Independent t-Test

| t       | DoF | P Value |
|---------|-----|---------|
| 4.44797 | 10  | 0.00124 |

Power Analysis

| Alpha | Total Sample Size | Power   |
|-------|-------------------|---------|
| 0.05  | 12                | 0.97467 |

Fig. 10A

One-Way ANOVA

| Source | DoF | Sum of Squares | Mean Square  | F Value  | P Value |
|--------|-----|----------------|--------------|----------|---------|
| Model  | 2   | 6.62935873     | 3.31467937   | 48.35607 | 0.00000 |
| Error  | 22  | 1.50804127     | 0.0685473304 |          |         |

Power Analysis

| Alpha | Total Sample Size | Power   |
|-------|-------------------|---------|
| 0.05  | 25                | 1.00000 |

-----  
**Fig. 10B**

Two Sample Independent t-Test

| t       | DoF | P Value |
|---------|-----|---------|
| 5.68947 | 12  | 0.00010 |

-----

Power Analysis

| Alpha | Total Sample Size | Power   |
|-------|-------------------|---------|
| 0.05  | 14                | 0.99785 |

-----

**Fig. 10C**

One-Way ANOVA

| Source | DoF | Sum of Squares | Mean Square  | F Value  | P Value |
|--------|-----|----------------|--------------|----------|---------|
| Model  | 2   | 6.62935873     | 3.31467937   | 48.35607 | 0.00000 |
| Error  | 22  | 1.50804127     | 0.0685473304 |          |         |

-----

Power Analysis

| Alpha | Total Sample Size | Power   |
|-------|-------------------|---------|
| 0.05  | 25                | 1.00000 |

-----

**Fig. 11A**

Two Sample Independent t-Test

| t        | DoF | P Value |
|----------|-----|---------|
| -6.13141 | 10  | 0.00011 |

-----

Power Analysis

Total



| Alpha | Sample Size | Power   |
|-------|-------------|---------|
| 0.05  | 12          | 0.99853 |

Fig. 11B

Two Sample Independent t-Test

| t        | DoF | P Value |
|----------|-----|---------|
| -3.81528 | 4   | 0.01885 |

Power Analysis

| Alpha | Total Sample Size | Power   |
|-------|-------------------|---------|
| 0.05  | 6                 | 0.82260 |

Fig. 11C

Two Sample Independent t-Test

| t        | DoF | P Value |
|----------|-----|---------|
| -2.57954 | 6   | 0.04180 |

Power Analysis

| Alpha | Total Sample Size | Power   |
|-------|-------------------|---------|
| 0.05  | 8                 | 0.55178 |

Fig. 11D

One-Way ANOVA

| Source | DoF | Sum of Squares | Mean Square | F Value | P Value |
|--------|-----|----------------|-------------|---------|---------|
| Model  | 3   | 9.25676061     | 3.08558687  | 7.29840 | 0.00210 |
| Error  | 18  | 7.60996667     | 0.422775926 |         |         |

-----  
Power Analysis

| Alpha | Total<br>Sample Size | Power   |
|-------|----------------------|---------|
| 0.05  | 22                   | 0.95389 |

-----

**Supplementary Figure S1. Uncropped images of the immunoblots presented in the main figures.**

(related to Figure 1)

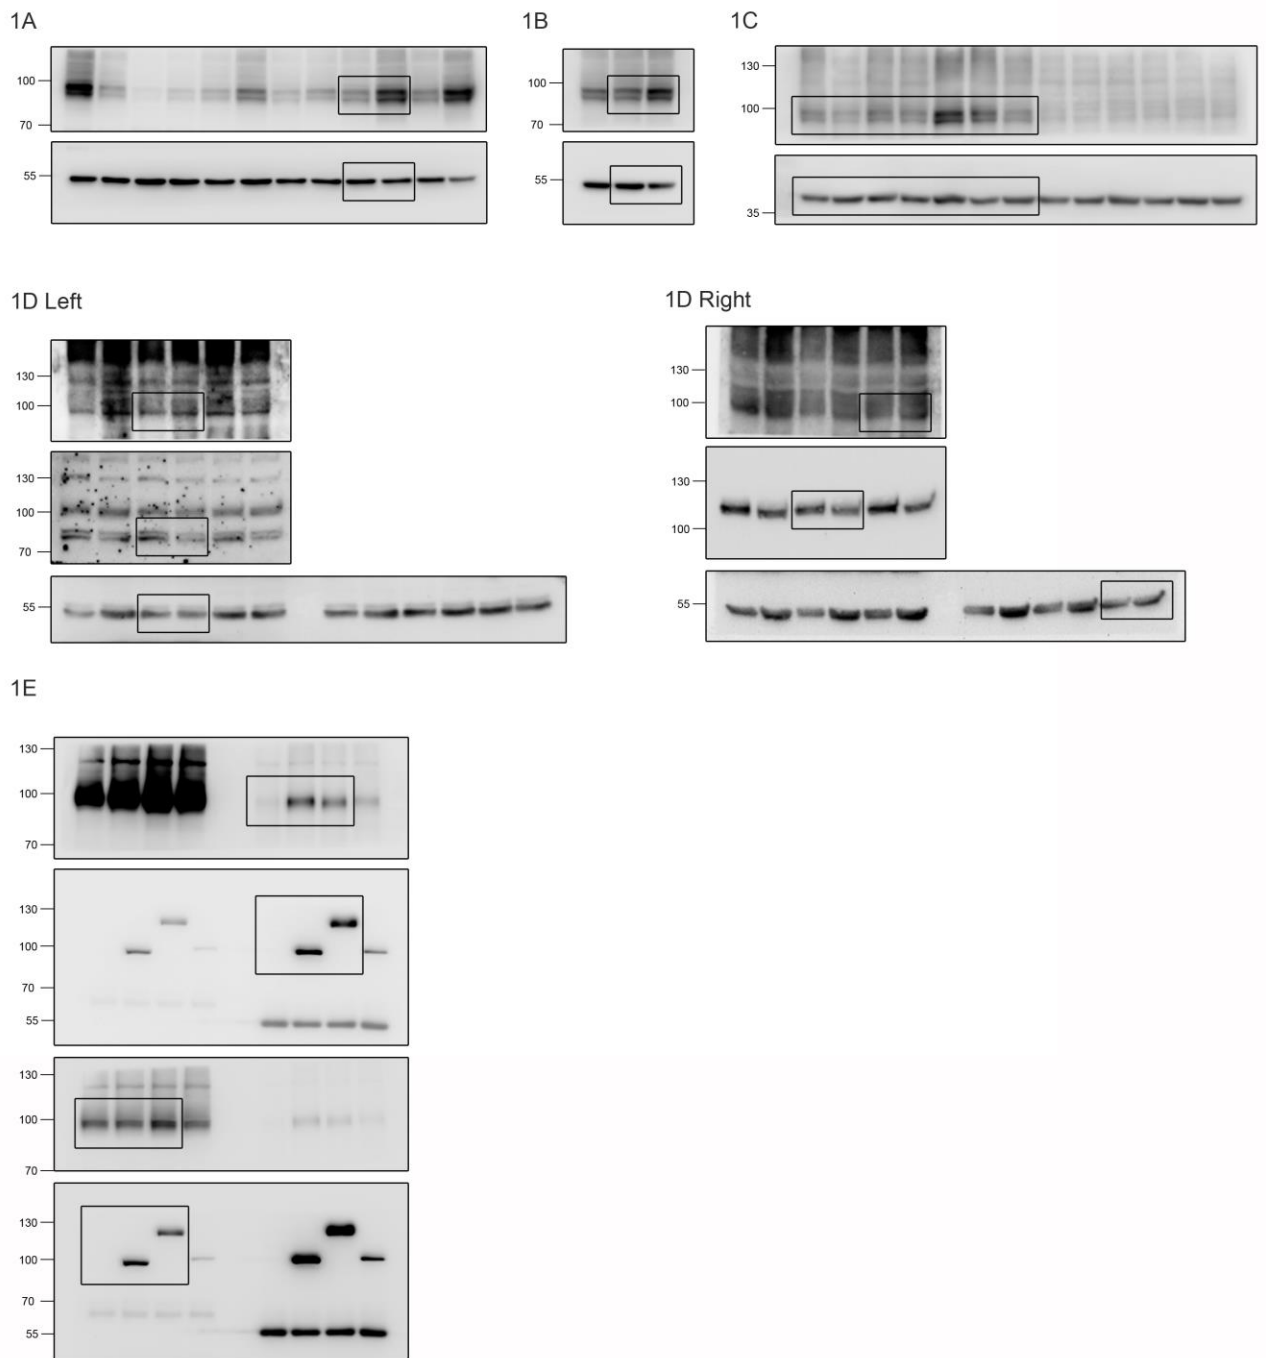

(related to Figure 2)

2A

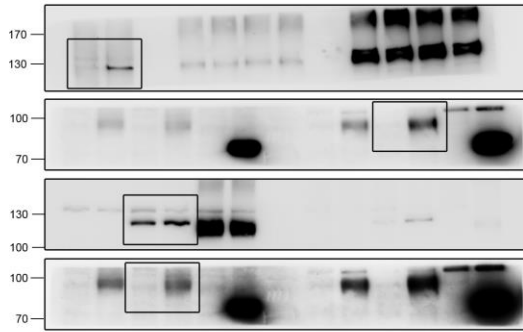

2B

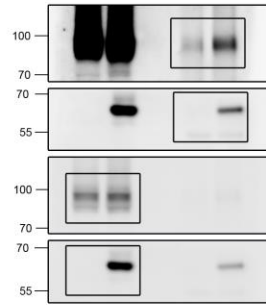

2C

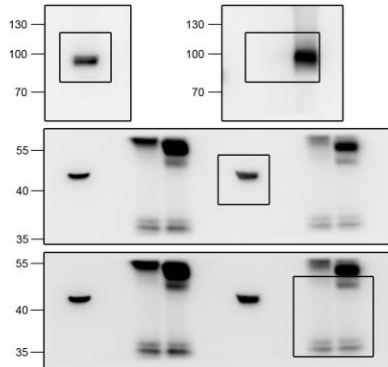

2D

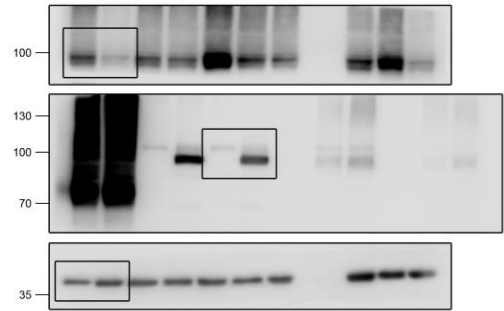

2E

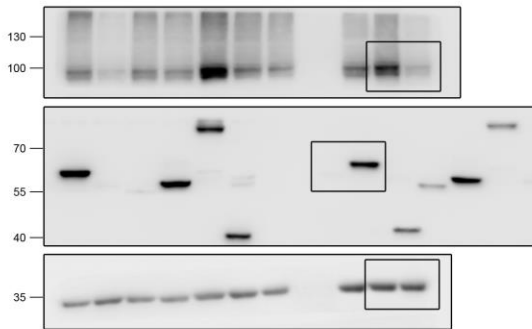

2F

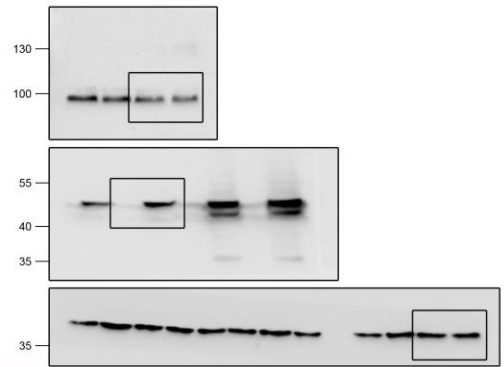

2G left

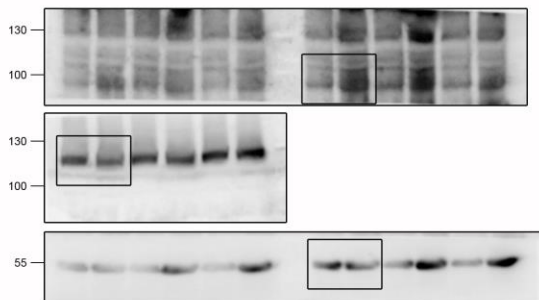

2G Right

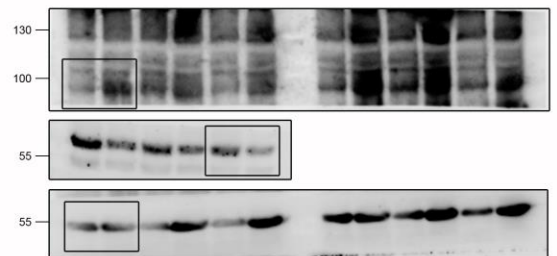

(related to Figure 3)

3A

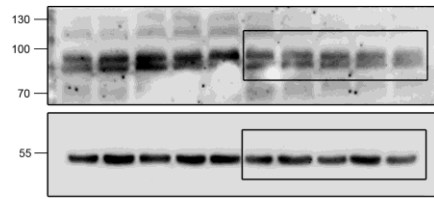

3B

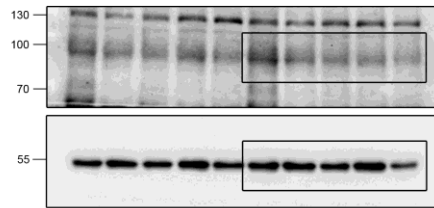

3C

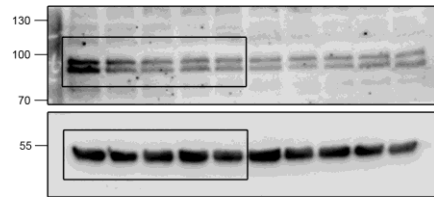

(related to Figure 4)

4A

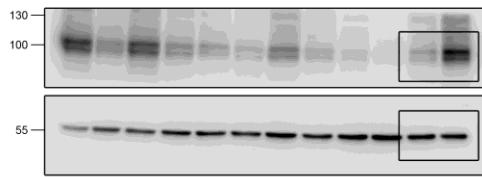

4B

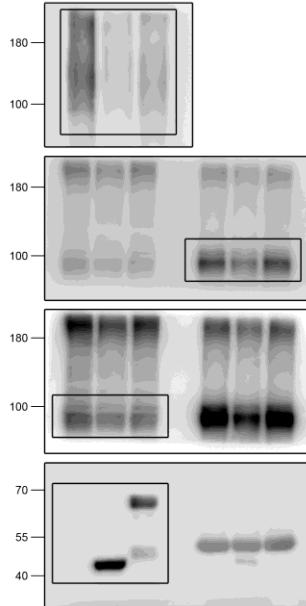

4C

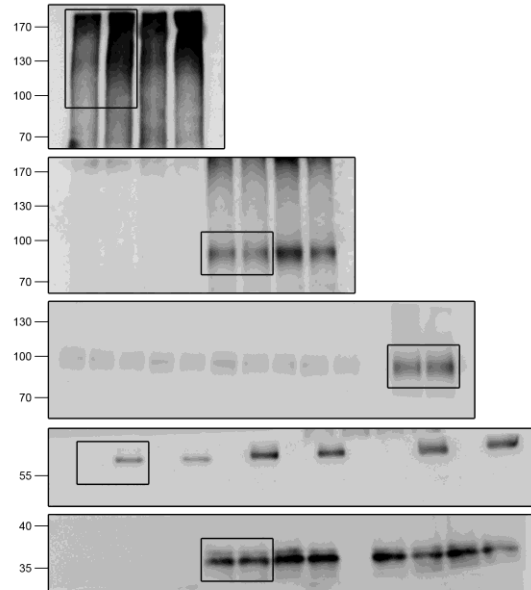

(related to Figure 5)

5A

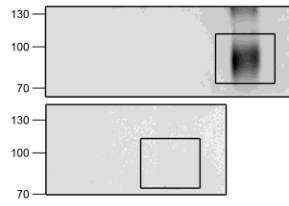

5B

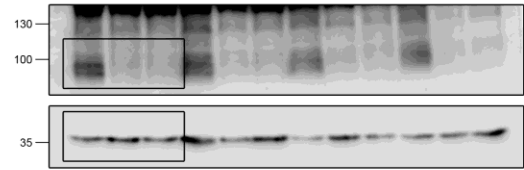

5C

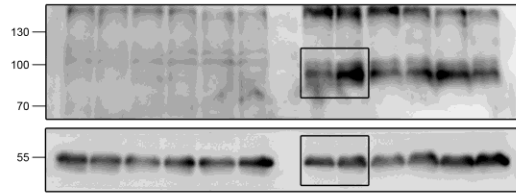

5D

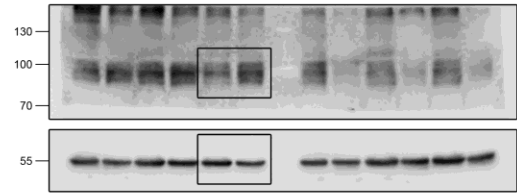

5E

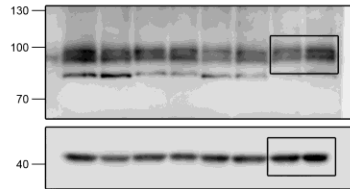

5F

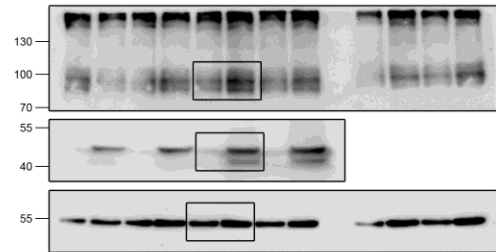

(related to Figure 6)

6A

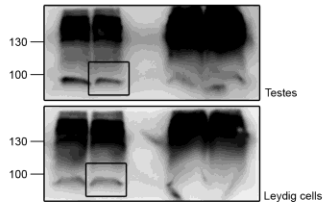

6B

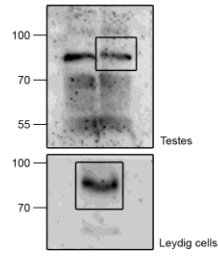

6C

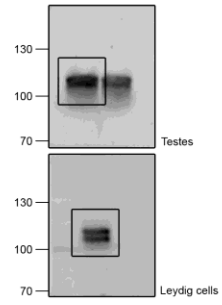

6D

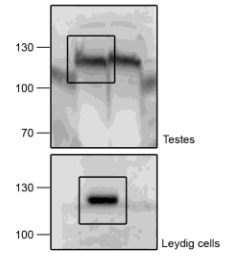

6E

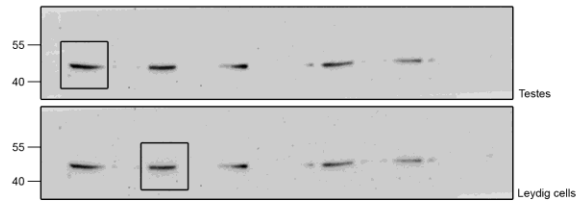



(related to Figure 7)

7A

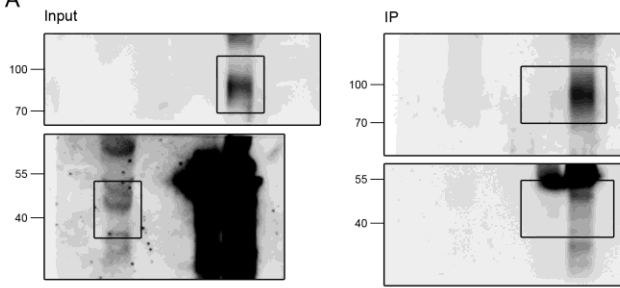

7B

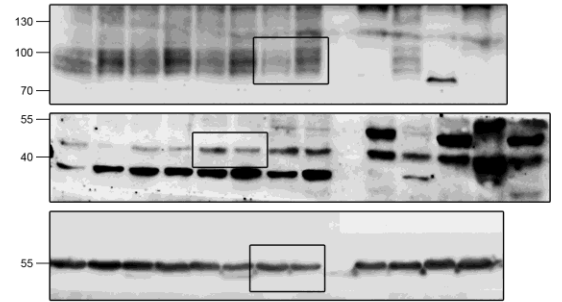

7C

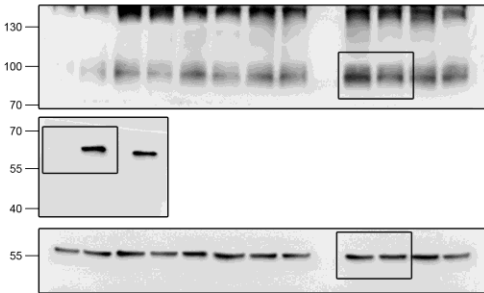

7D

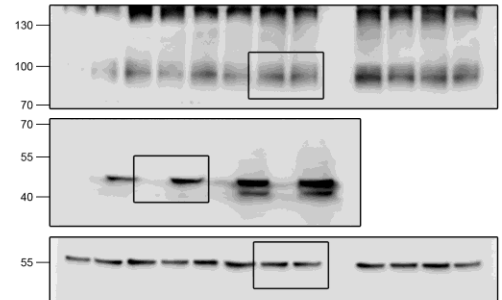

7E

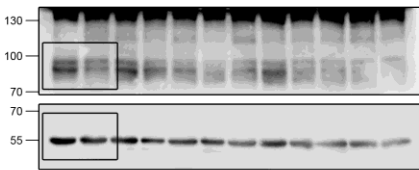

(related to Figure 8)

8A

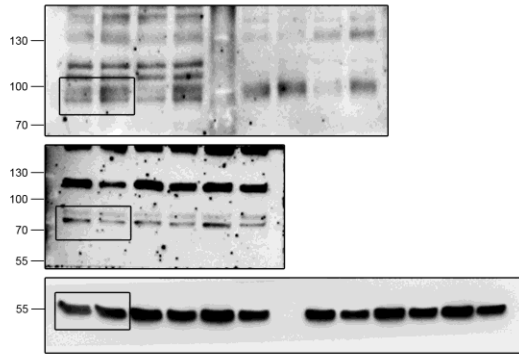

8B

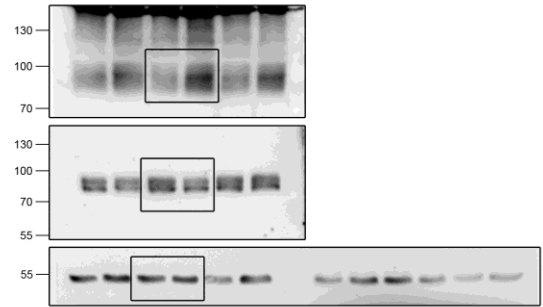

8C

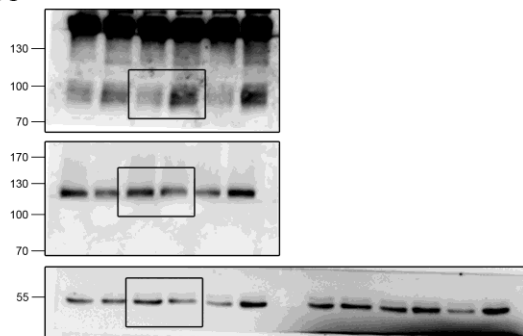

(related to Figure 10)

10A

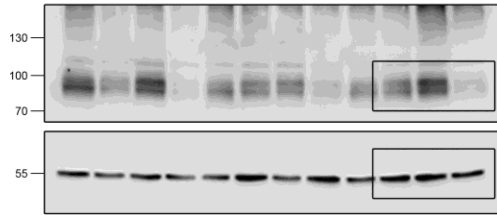

10B

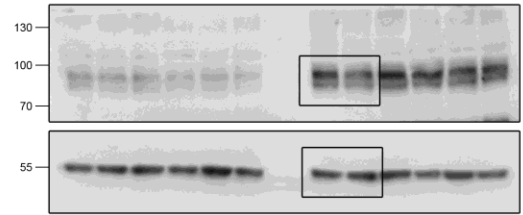

10C

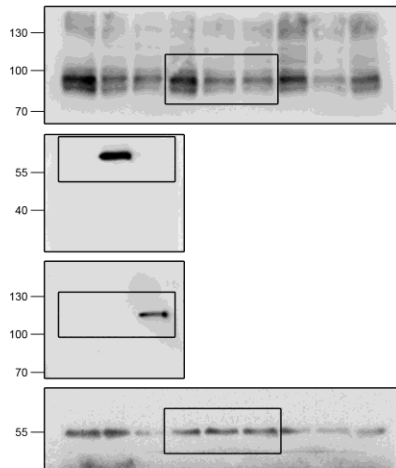

10D

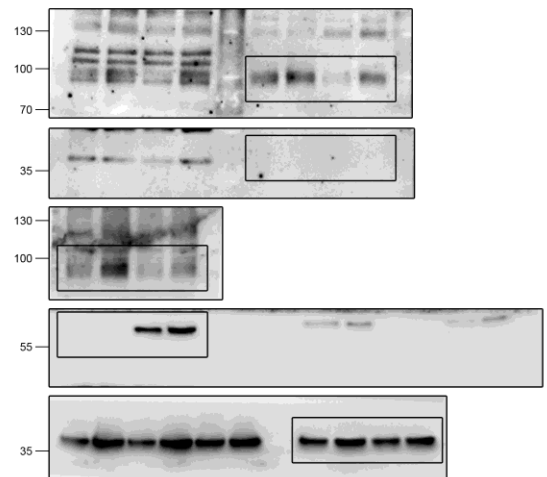

(related to Figure 11)

11A

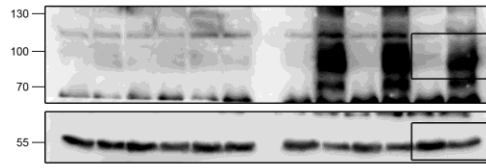

11B

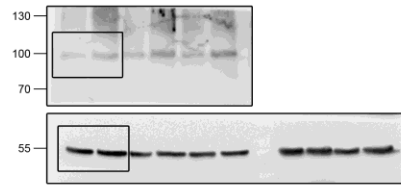

11C

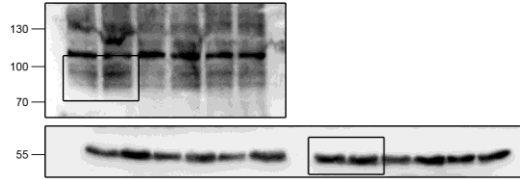

11D

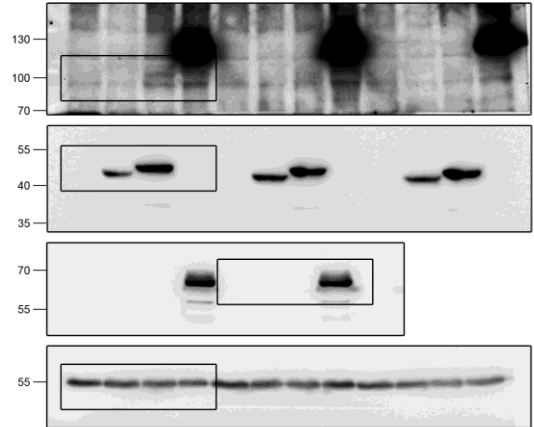

Supplement: cells-09-01332-s001.pdf [file cells-09-01332-s001.pdf]
